# Supplementary material for: Effects of nitrogen and phosphorus addition on growth and leaf nitrogen metabolism of alfalfa in alkaline soil in Yinchuan Plain of Hetao Basin
Source: PeerJ. 2022 Apr 13;10:e13261. doi: 10.7717/peerj.13261 (PMC9013234; doi:10.7717/peerj.13261)
Supplement: Supplemental Information 1 [file peerj-10-13261-s001.xlsx]

## Sheet: Sheet1
NR
2020
7.15							7.22						7.29						8.05						8.12						8.19
	ce	dui	kong	biao	NR(μmol/h/g)		ce	dui	kong	biao	NR(μmol/h/g)		ce	dui	kong	biao	NR(μmol/h/g)		ce	dui	kong	biao	NR(μmol/h/g)		ce	dui	kong	biao	NR(μmol/h/g)		ce	dui	kong	biao	NR(μmol/h/g)
WN	0.516	0.255	0.03	0.243	2.4507		0.546	0.266	0.03	0.243	2.62911		0.606	0.261	0.03	0.243	3.23944		0.463	0.199	0.03	0.243	2.47887		0.435	0.307	0.03	0.243	1.20188		0.475	0.319	0.03	0.243	1.46479
	0.497	0.26	0.03	0.243	2.22535	2.01565	0.537	0.271	0.03	0.243	2.49765	2.25665	0.567	0.272	0.03	0.243	2.76995	2.75743	0.474	0.244	0.03	0.243	2.15962	2.41315	0.555	0.262	0.03	0.243	2.75117	2.23474	0.465	0.274	0.03	0.243	1.79343	1.77778
	0.502	0.356	0.03	0.243	1.37089		0.542	0.367	0.03	0.243	1.64319		0.612	0.371	0.03	0.243	2.26291		0.479	0.202	0.03	0.243	2.60094		0.528	0.235	0.03	0.243	2.75117		0.468	0.247	0.03	0.243	2.07512
ZN	0.576	0.26	0.03	0.243	2.96714		0.656	0.271	0.03	0.243	3.61502		0.696	0.266	0.03	0.243	4.03756		0.513	0.204	0.03	0.243	2.90141		0.555	0.312	0.03	0.243	2.28169		0.475	0.324	0.03	0.243	1.41784
	0.551	0.265	0.03	0.243	2.68545	2.47887	0.611	0.276	0.03	0.243	3.14554	3.09546	0.689	0.277	0.03	0.243	3.86854	3.53365	0.524	0.249	0.03	0.243	2.58216	2.83568	0.545	0.267	0.03	0.243	2.61033	2.65728	0.505	0.279	0.03	0.243	2.12207	2.04382
	0.551	0.361	0.03	0.243	1.78404		0.641	0.372	0.03	0.243	2.52582		0.663	0.376	0.03	0.243	2.69484		0.529	0.207	0.03	0.243	3.02347		0.568	0.24	0.03	0.243	3.07981		0.528	0.252	0.03	0.243	2.59155
GN	0.526	0.256	0.03	0.243	2.53521		0.636	0.267	0.03	0.243	3.46479		0.586	0.252	0.03	0.243	3.13615		0.503	0.2	0.03	0.243	2.84507		0.475	0.308	0.03	0.243	1.56808		0.455	0.32	0.03	0.243	1.26761
	0.509	0.261	0.03	0.243	2.32864	2.28482	0.629	0.272	0.03	0.243	3.35211	2.99531	0.569	0.233	0.03	0.243	3.15493	3.22692	0.484	0.246	0.03	0.243	2.23474	2.77621	0.492	0.264	0.03	0.243	2.14085	1.99374	0.485	0.276	0.03	0.243	1.96244	1.89045
	0.573	0.361	0.03	0.243	1.99061		0.603	0.372	0.03	0.243	2.16901		0.603	0.242	0.03	0.243	3.38967		0.549	0.203	0.03	0.243	3.24883		0.478	0.236	0.03	0.243	2.2723		0.508	0.248	0.03	0.243	2.44131
WP	0.496	0.256	0.03	0.243	2.25352		0.526	0.264	0.03	0.243	2.46009		0.566	0.259	0.03	0.243	2.88263		0.443	0.197	0.03	0.243	2.30986		0.455	0.305	0.03	0.243	1.40845		0.465	0.317	0.03	0.243	1.38967
	0.477	0.261	0.03	0.243	2.02817	1.81847	0.587	0.267	0.03	0.243	3.00469	2.63537	0.547	0.262	0.03	0.243	2.67606	2.75743	0.404	0.2	0.03	0.243	1.91549	2.07825	0.475	0.308	0.03	0.243	1.56808	1.759	0.485	0.32	0.03	0.243	1.5493	1.61502
	0.482	0.357	0.03	0.243	1.17371		0.532	0.272	0.03	0.243	2.44131		0.562	0.273	0.03	0.243	2.71362		0.459	0.245	0.03	0.243	2.00939		0.508	0.263	0.03	0.243	2.30047		0.478	0.275	0.03	0.243	1.9061
ZP	0.566	0.261	0.03	0.243	2.86385		0.616	0.368	0.03	0.243	2.32864		0.666	0.372	0.03	0.243	2.76056		0.493	0.203	0.03	0.243	2.723		0.555	0.236	0.03	0.243	2.99531		0.455	0.248	0.03	0.243	1.94366
	0.571	0.266	0.03	0.243	2.86385	2.47574	0.656	0.272	0.03	0.243	3.60563	3.02347	0.679	0.267	0.03	0.243	3.86854	3.38341	0.504	0.205	0.03	0.243	2.80751	2.62285	0.535	0.313	0.03	0.243	2.08451	2.53834	0.485	0.325	0.03	0.243	1.50235	1.86228
	0.543	0.362	0.03	0.243	1.69953		0.611	0.277	0.03	0.243	3.13615		0.653	0.278	0.03	0.243	3.52113		0.499	0.25	0.03	0.243	2.33803		0.538	0.268	0.03	0.243	2.53521		0.508	0.28	0.03	0.243	2.14085
GP	0.526	0.257	0.03	0.243	2.52582		0.566	0.373	0.03	0.243	1.81221		0.596	0.377	0.03	0.243	2.05634		0.483	0.208	0.03	0.243	2.58216		0.465	0.241	0.03	0.243	2.10329		0.435	0.253	0.03	0.243	1.70892
	0.489	0.262	0.03	0.243	2.13146	2.15336	0.569	0.268	0.03	0.243	2.82629	2.51643	0.599	0.253	0.03	0.243	3.24883	2.94836	0.464	0.201	0.03	0.243	2.46948	2.50391	0.465	0.309	0.03	0.243	1.46479	1.85603	0.465	0.321	0.03	0.243	1.35211	1.64945
	0.553	0.361	0.03	0.243	1.80282		0.583	0.273	0.03	0.243	2.9108		0.611	0.234	0.03	0.243	3.53991		0.509	0.247	0.03	0.243	2.46009		0.478	0.265	0.03	0.243	2		0.478	0.277	0.03	0.243	1.88732
NP	0.596	0.253	0.03	0.243	3.22066		0.666	0.264	0.03	0.243	3.77465		0.716	0.259	0.03	0.243	4.29108		0.533	0.197	0.03	0.243	3.15493		0.565	0.305	0.03	0.243	2.44131		0.515	0.317	0.03	0.243	1.85915
	0.591	0.258	0.03	0.243	3.12676	2.83255	0.671	0.269	0.03	0.243	3.77465	3.31768	0.689	0.27	0.03	0.243	3.93427	3.69327	0.524	0.242	0.03	0.243	2.64789	3.0266	0.555	0.26	0.03	0.243	2.76995	2.8169	0.525	0.272	0.03	0.243	2.37559	2.32864
	0.583	0.354	0.03	0.243	2.15023		0.621	0.365	0.03	0.243	2.40376		0.673	0.369	0.03	0.243	2.85446		0.549	0.2	0.03	0.243	3.277		0.578	0.233	0.03	0.243	3.23944		0.538	0.245	0.03	0.243	2.75117
2021																															8.2
	7.12						7.19						7.28						8.06						8.13
	ce	dui	kong	biao	NR(μmol/h/g)		ce	dui	kong	biao	NR(μmol/h/g)		ce	dui	kong	biao	NR(μmol/h/g)		ce	dui	kong	biao	NR(μmol/h/g)		ce	dui	kong	biao	NR(μmol/h/g)		ce	dui	kong	biao	NR(μmol/h/g)
WN	0.526	0.25	0.03	0.243	2.59155		0.566	0.261	0.03	0.243	2.86385		0.616	0.256	0.03	0.243	3.38028		0.473	0.194	0.03	0.243	2.61972		0.445	0.302	0.03	0.243	1.34272		0.455	0.311	0.03	0.243	1.35211
	0.507	0.255	0.03	0.243	2.3662	2.15649	0.597	0.266	0.03	0.243	3.10798	2.67919	0.587	0.267	0.03	0.243	3.00469	2.92958	0.444	0.239	0.03	0.243	1.92488	2.2723	0.455	0.257	0.03	0.243	1.85915	2.0313	0.475	0.266	0.03	0.243	1.96244	1.8216
	0.512	0.351	0.03	0.243	1.51174		0.582	0.362	0.03	0.243	2.06573		0.622	0.366	0.03	0.243	2.40376		0.439	0.197	0.03	0.243	2.2723		0.538	0.23	0.03	0.243	2.89202		0.468	0.239	0.03	0.243	2.15023
ZN	0.586	0.255	0.03	0.243	3.10798		0.606	0.266	0.03	0.243	3.19249		0.686	0.261	0.03	0.243	3.99061		0.523	0.199	0.03	0.243	3.04225		0.535	0.307	0.03	0.243	2.14085		0.485	0.316	0.03	0.243	1.58685
	0.591	0.26	0.03	0.243	3.10798	2.7543	0.621	0.271	0.03	0.243	3.28638	2.98592	0.679	0.272	0.03	0.243	3.8216	3.5493	0.484	0.244	0.03	0.243	2.25352	2.72613	0.525	0.262	0.03	0.243	2.46948	2.45383	0.515	0.271	0.03	0.243	2.29108	2.11894
	0.574	0.356	0.03	0.243	2.04695		0.631	0.367	0.03	0.243	2.47887		0.673	0.371	0.03	0.243	2.83568		0.509	0.202	0.03	0.243	2.88263		0.528	0.235	0.03	0.243	2.75117		0.508	0.244	0.03	0.243	2.47887
GN	0.546	0.251	0.03	0.243	2.76995		0.596	0.262	0.03	0.243	3.13615		0.596	0.247	0.03	0.243	3.277		0.453	0.195	0.03	0.243	2.42254		0.495	0.303	0.03	0.243	1.80282		0.465	0.312	0.03	0.243	1.43662
	0.539	0.256	0.03	0.243	2.65728	2.33177	0.619	0.267	0.03	0.243	3.30516	3.13615	0.579	0.228	0.03	0.243	3.29577	3.36776	0.494	0.241	0.03	0.243	2.37559	2.47887	0.525	0.259	0.03	0.243	2.49765	2.30047	0.495	0.268	0.03	0.243	2.13146	2.05947
	0.523	0.356	0.03	0.243	1.56808		0.683	0.367	0.03	0.243	2.96714		0.613	0.237	0.03	0.243	3.53052		0.479	0.198	0.03	0.243	2.6385		0.508	0.231	0.03	0.243	2.60094		0.518	0.24	0.03	0.243	2.61033
WP	0.516	0.251	0.03	0.243	2.48826		0.506	0.259	0.03	0.243	2.31925		0.596	0.254	0.03	0.243	3.21127		0.473	0.192	0.03	0.243	2.6385		0.475	0.3	0.03	0.243	1.64319		0.475	0.309	0.03	0.243	1.55869
	0.497	0.256	0.03	0.243	2.26291	2.02191	0.527	0.262	0.03	0.243	2.48826	2.30673	0.557	0.257	0.03	0.243	2.8169	2.99218	0.464	0.195	0.03	0.243	2.52582	2.43818	0.445	0.303	0.03	0.243	1.33333	1.80595	0.485	0.312	0.03	0.243	1.62441	1.72144
	0.492	0.352	0.03	0.243	1.31455		0.492	0.267	0.03	0.243	2.11268		0.582	0.268	0.03	0.243	2.94836		0.469	0.24	0.03	0.243	2.15023		0.518	0.258	0.03	0.243	2.44131		0.478	0.267	0.03	0.243	1.98122
ZP	0.556	0.256	0.03	0.243	2.8169		0.616	0.363	0.03	0.243	2.37559		0.666	0.367	0.03	0.243	2.80751		0.503	0.198	0.03	0.243	2.86385		0.515	0.231	0.03	0.243	2.66667		0.465	0.24	0.03	0.243	2.11268
	0.561	0.261	0.03	0.243	2.8169	2.54773	0.621	0.267	0.03	0.243	3.32394	2.93897	0.639	0.262	0.03	0.243	3.53991	3.33646	0.514	0.2	0.03	0.243	2.94836	2.95149	0.435	0.308	0.03	0.243	1.19249	2.11581	0.495	0.317	0.03	0.243	1.67136	2.0313
	0.571	0.357	0.03	0.243	2.00939		0.604	0.272	0.03	0.243	3.11737		0.663	0.273	0.03	0.243	3.66197		0.569	0.245	0.03	0.243	3.04225		0.528	0.263	0.03	0.243	2.48826		0.518	0.272	0.03	0.243	2.30986
GP	0.536	0.252	0.03	0.243	2.66667		0.576	0.368	0.03	0.243	1.95305		0.596	0.372	0.03	0.243	2.10329		0.493	0.203	0.03	0.243	2.723		0.515	0.236	0.03	0.243	2.61972		0.445	0.245	0.03	0.243	1.87793
	0.499	0.257	0.03	0.243	2.2723	2.29421	0.639	0.263	0.03	0.243	3.53052	2.84507	0.639	0.248	0.03	0.243	3.67136	3.15806	0.474	0.196	0.03	0.243	2.61033	2.70736	0.505	0.304	0.03	0.243	1.88732	2.21596	0.475	0.313	0.03	0.243	1.52113	1.84977
	0.563	0.356	0.03	0.243	1.94366		0.593	0.268	0.03	0.243	3.05164		0.623	0.229	0.03	0.243	3.69953		0.539	0.242	0.03	0.243	2.78873		0.488	0.26	0.03	0.243	2.14085		0.498	0.269	0.03	0.243	2.15023
NP	0.586	0.249	0.03	0.243	3.16432		0.646	0.261	0.03	0.243	3.61502		0.676	0.255	0.03	0.243	3.95305		0.523	0.193	0.03	0.243	3.09859		0.545	0.301	0.03	0.243	2.29108		0.515	0.31	0.03	0.243	1.92488
	0.601	0.254	0.03	0.243	3.25822	2.90454	0.631	0.266	0.03	0.243	3.42723	3.15806	0.689	0.266	0.03	0.243	3.97183	3.66823	0.524	0.238	0.03	0.243	2.68545	3.40845	0.525	0.256	0.03	0.243	2.52582	2.57277	0.525	0.265	0.03	0.243	2.44131	2.26917
	0.594	0.35	0.03	0.243	2.29108		0.621	0.362	0.03	0.243	2.43192		0.693	0.365	0.03	0.243	3.07981		0.669	0.196	0.03	0.243	4.44131		0.538	0.229	0.03	0.243	2.90141		0.498	0.238	0.03	0.243	2.44131
